# Supplementary material
Source: PubMed Central journal article supplement (PMC2651236)
Supplement: 0809620106_0809620106SI.pdf [file 0809620106_0809620106SI.pdf]

# Supporting Information

Pérez *et al.* 10.1073/pnas.0809620106

Age (Yrs): 2-4 5 10 12 13 24

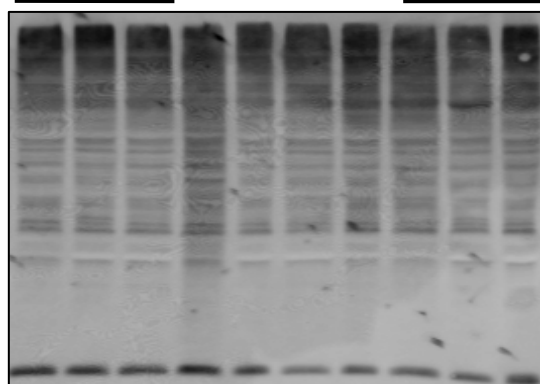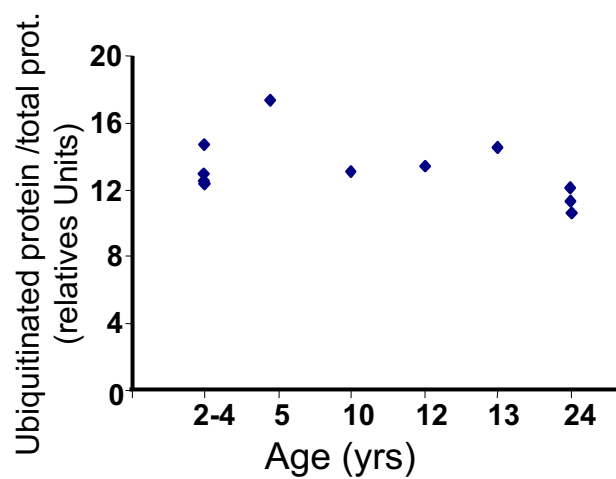

**Fig. S1.** Unchanged ubiquitinated proteins with age in MRs. The age-related changes in the ubiquitinated protein profile (analyzed by Western blot) in MRs were determined by using cytosolic protein homogenates from the livers of MRs at different ages (2–4, 5, 10, 12, 13, and 24 years).

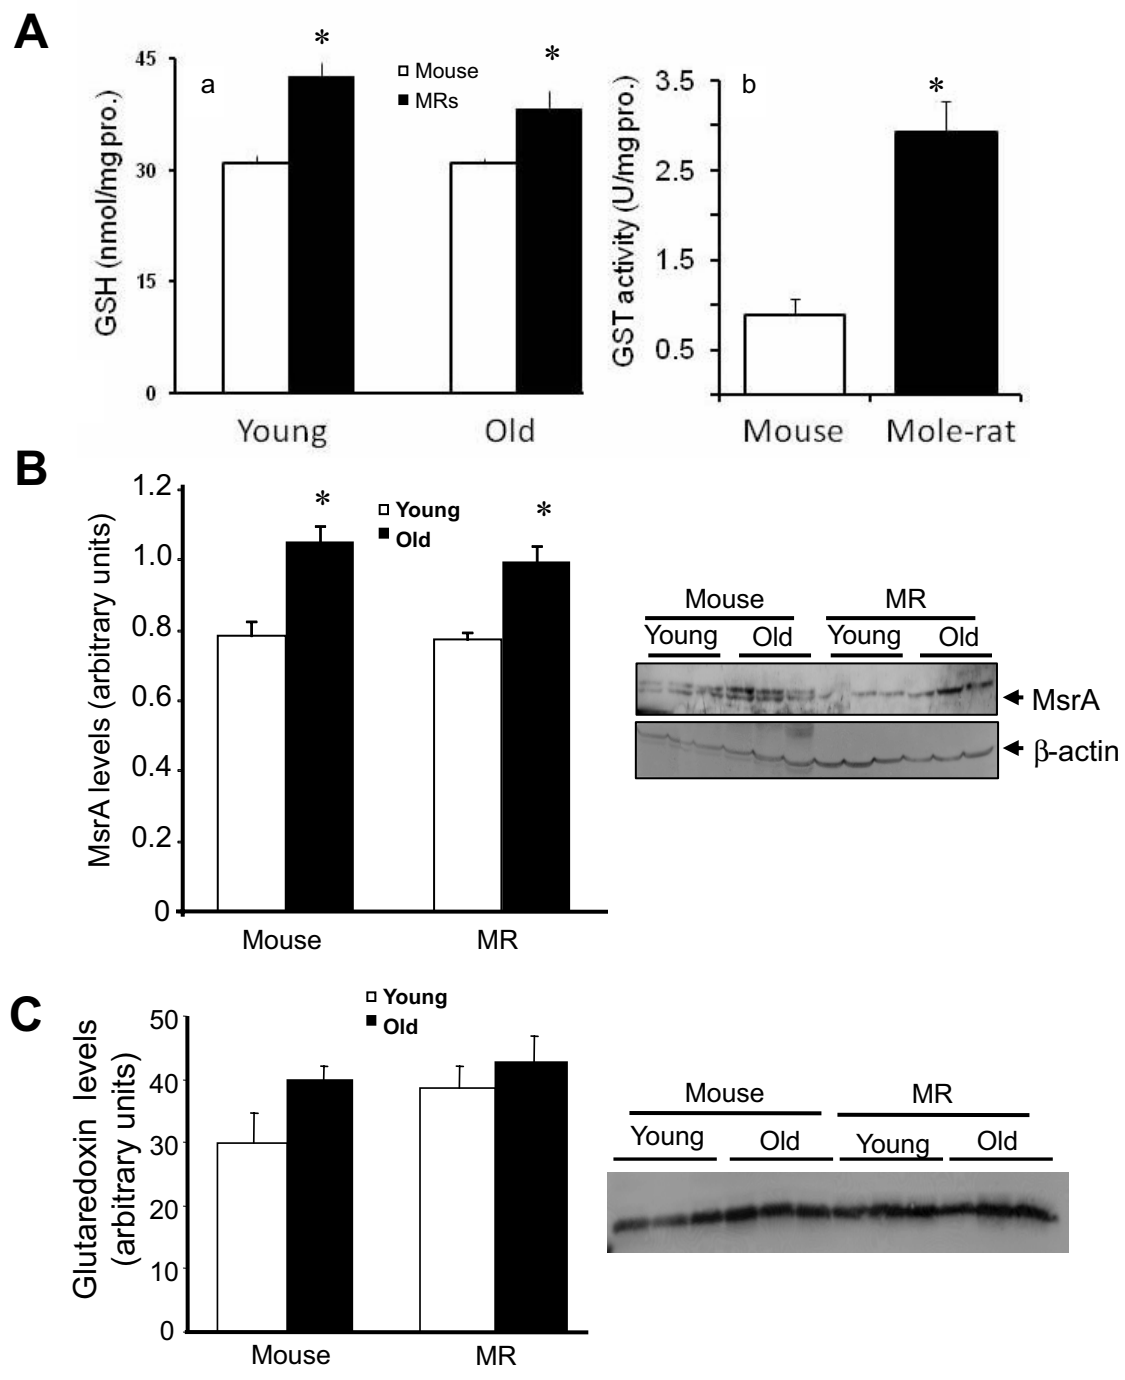

**Fig. S2.** Enhanced protein detoxification but unchanged protein repair in MRs when compared with mice. (A) Levels of GSH (young and old) and GST (young) are significantly elevated in MRs than mice. (B and C) MsrA (B) and Glutaredoxin (C) levels in mice and MRs are similar. Data (mean  $\pm$  SEM for 3 individuals for each species) were analyzed by nonparametric ANOVA. \*,  $P = 0.044$ .
